# Supplementary material for: Identification of key oxidative intermediates and the function of chromium dopants in PKU-8: catalytic dehydrogenation of sec-alcohols with tert-butylhydroperoxide
Source: Royal Society of Chemistry journal article supplement (doi:10.1039/d0cy01822h), 2020-12-10
Supplement: d0cy01822h1.pdf [file d0cy01822h1.pdf]

**Supporting Information for**

**Identification of the key oxidative intermediates and the function of  
chromium dopants in PKU-8: catalytic dehydrogenation of sec-alcohols with  
*tert*-butylhydroperoxide**

Weilu Wang,<sup>a</sup> Yang He,<sup>b</sup> Junkai He,<sup>c</sup> Yanliu Dang,<sup>c</sup> Tharindu Kankanmkapuge,<sup>c</sup> Wenliang Gao,<sup>\*a</sup>

Rihong Cong,<sup>a</sup> Steven L. Suib,<sup>\*c</sup> and Tao Yang<sup>\*a</sup>

<sup>a</sup> College of Chemistry and Chemical Engineering, Chongqing University, Chongqing 401331, People's  
Republic of China

<sup>b</sup> Department of Chemistry and Chemical Engineering, University of Tennessee, Knoxville, TN, 37996,  
United States

<sup>c</sup> Department of Chemistry, University of Connecticut, Storrs, CT, 06269, United States

\*Corresponding authors: gaowl@cqu.edu.cn; steven.suib@uconn.edu; taoyang@cqu.edu.cn.

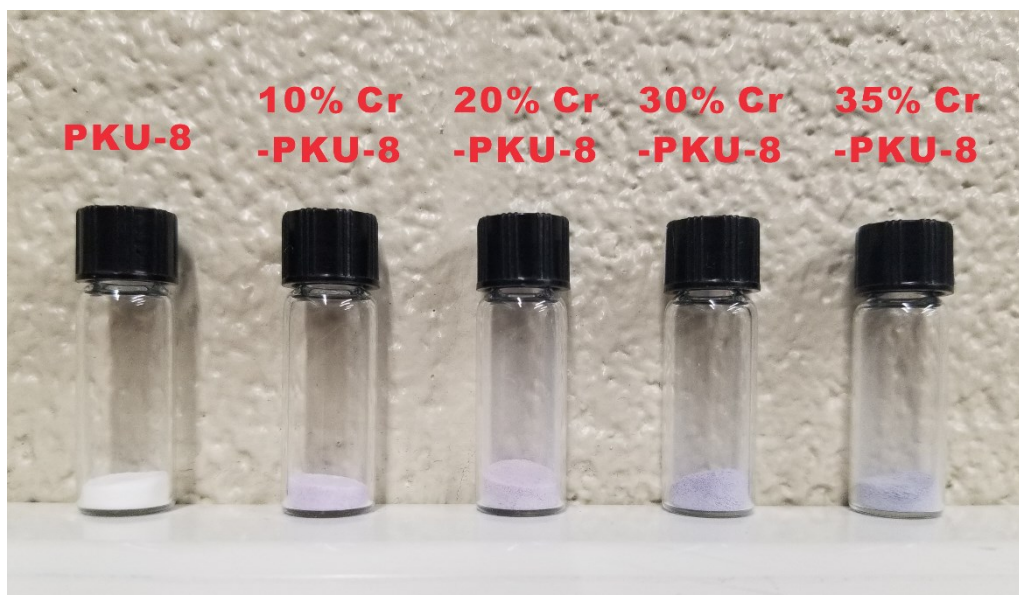

**Figure S1.** A photograph for as synthesized  $x$  Cr-PKU-8 ( $x = 0\%$ ,  $10\%$ ,  $20\%$ ,  $30\%$  and  $35\%$ ).

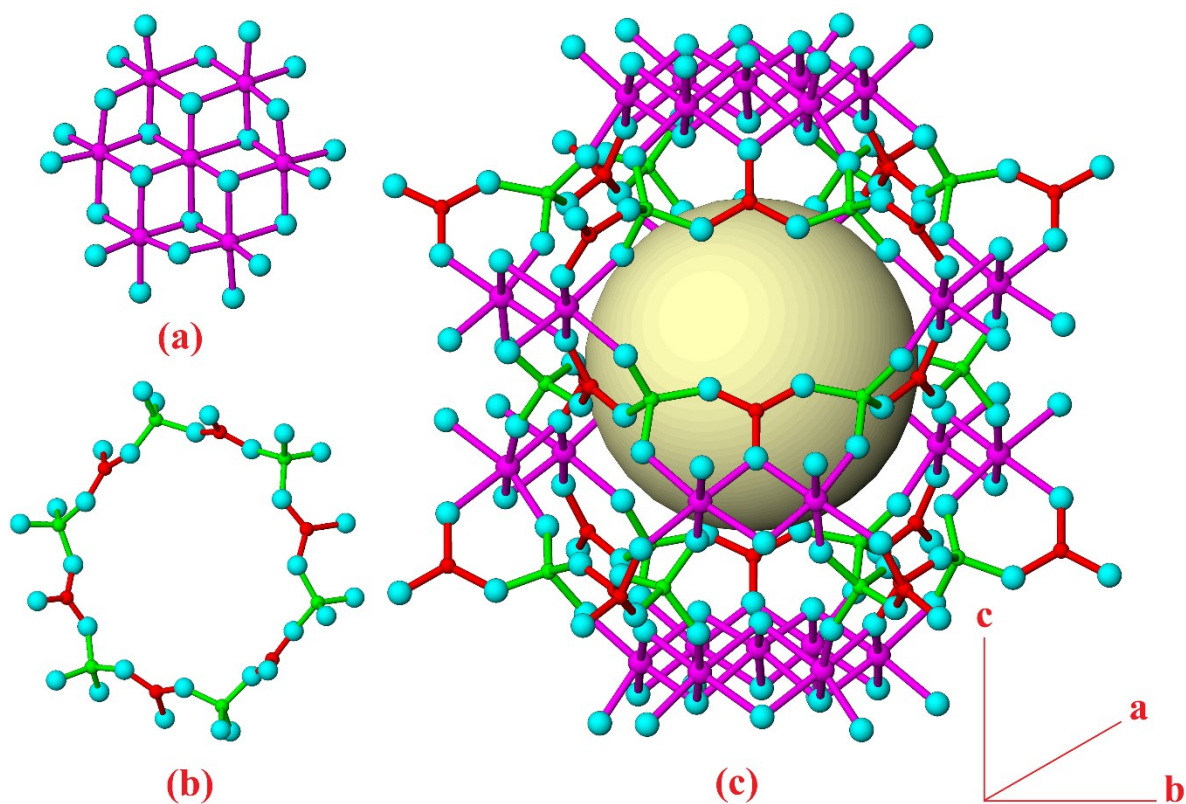

**Figure S2.** A schematic projection of the structure of PKU-8, (a) octahedral  $[\text{Al}_7\text{O}_{24}]$  clusters; (b) 12-membered borate ring  $[\text{B}_{12}\text{O}_{30}]$ ; (c) cavity and possible resident species in the structure. Color code: Al, pink; O, cyan; triangular B, red; tetrahedral B, green. The cavity is presented as a large yellow sphere.

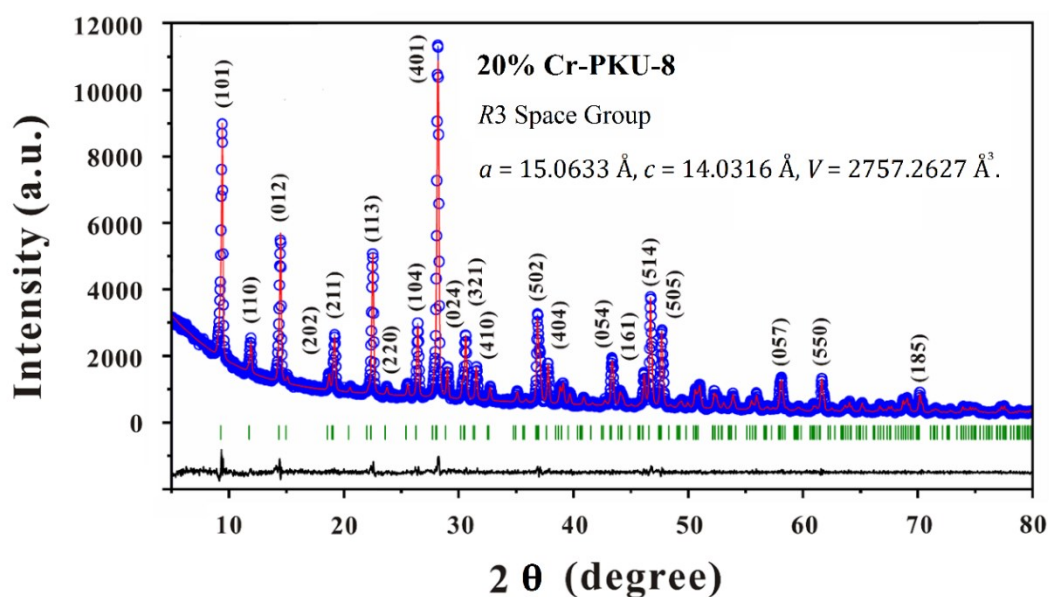

**Figure S3.** Le Bail fitting to powder XRD pattern for as-synthesized 20% Cr-PKU-8. The blue circles, red and black lines represent the observed, calculated data and the difference between them. The green bars below are the expected reflection positions by the space group  $R3$ .

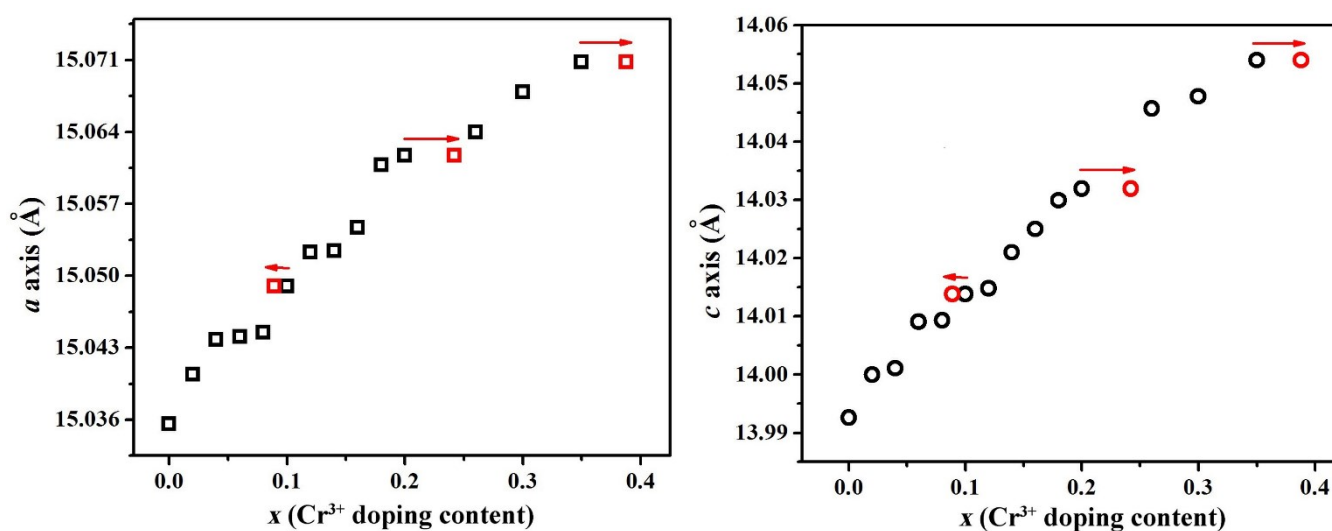

**Figure S4.** The refined cell lattice patterns ( $a$ - and  $c$ -axes length) obtained by Le Bail fitting along with the  $\text{Cr}^{3+}$  doping content. The  $x$  values for red ones were obtained from the ICP-AES.

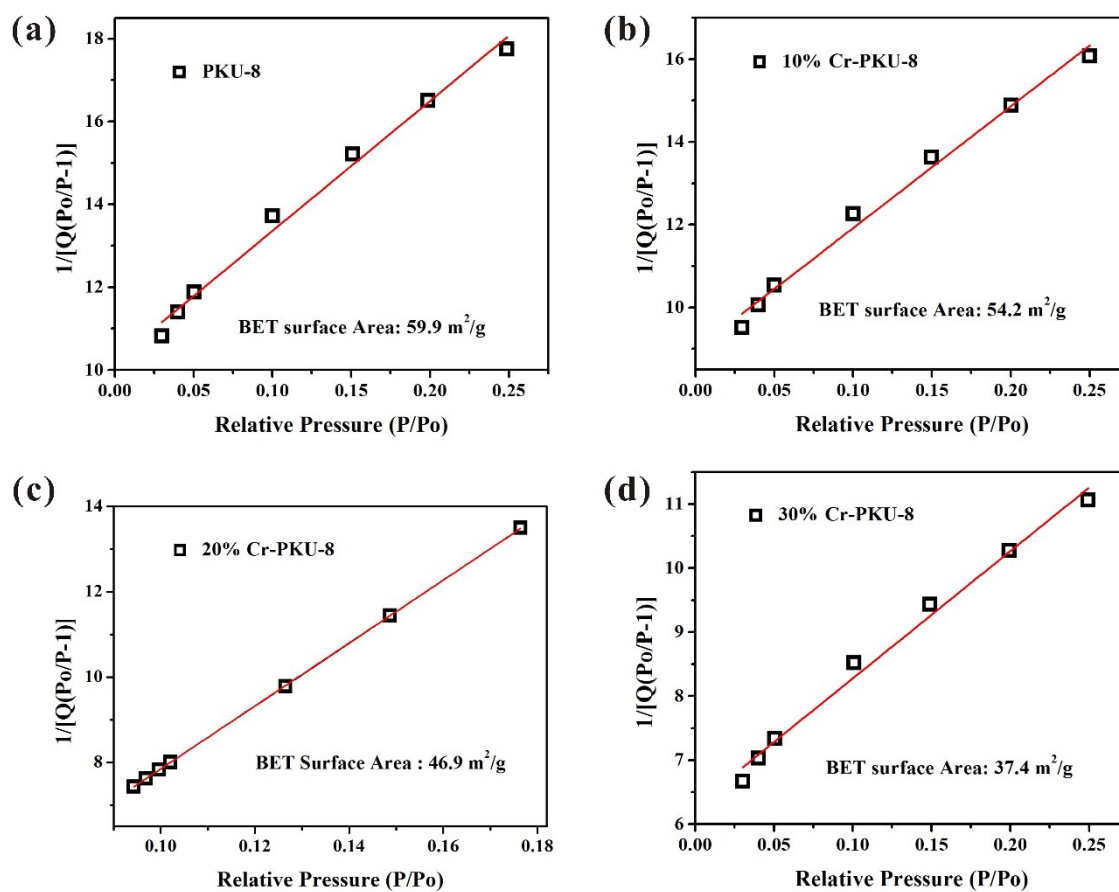

**Figure S5.** The BET specific surface area determined by N<sub>2</sub> adsorption-desorption method: (a) PKU-8, (b) 10% Cr-PKU-8, (c) 20% Cr-PKU-8 and (d) 30% Cr-PKU-8.

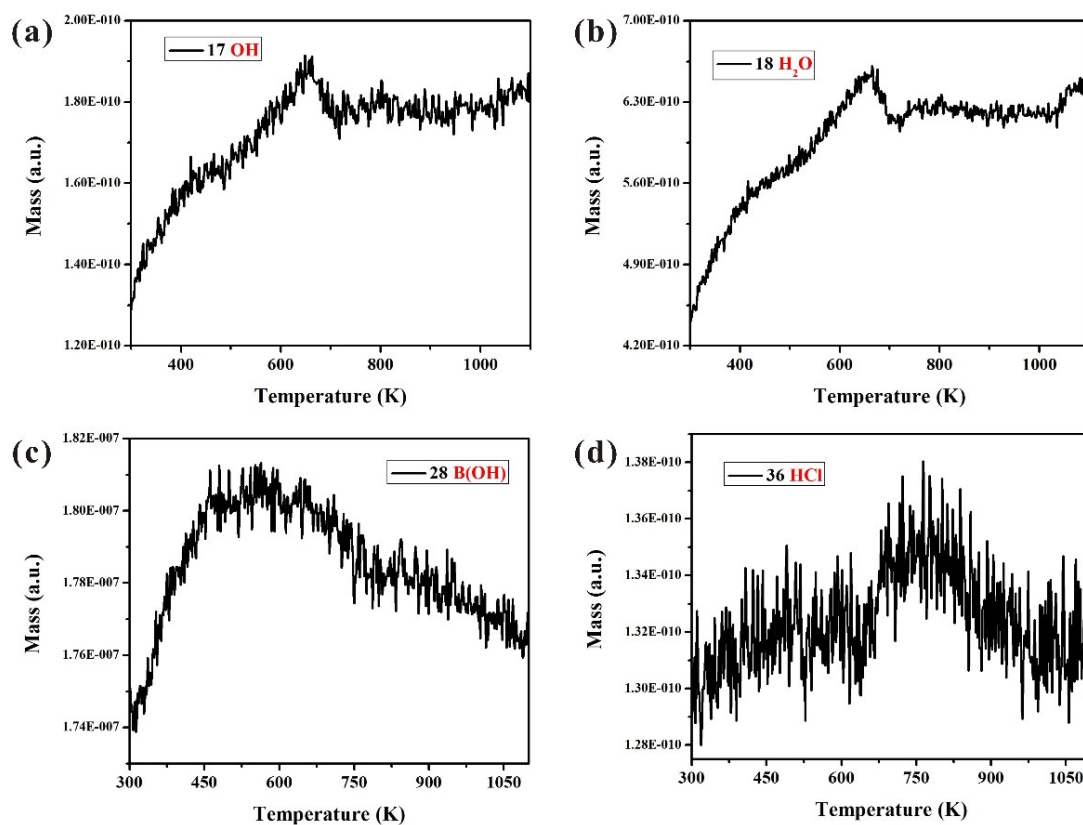

**Figure S6.** TG-MS analysis for 20% Cr-PKU-8: (a) OH (b)  $\text{H}_2\text{O}$  (c) B(OH), and (d) HCl.

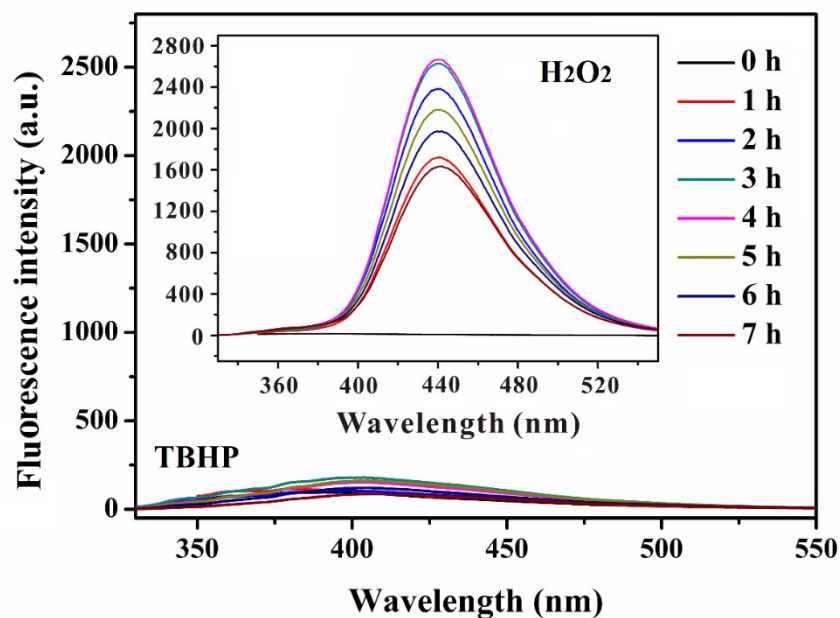

**Figure S7.**  $\text{OH}^*$  active species evidenced by fluorescent TA method using different oxidants: 70% TBHP and 30%  $\text{H}_2\text{O}_2$  (inset).

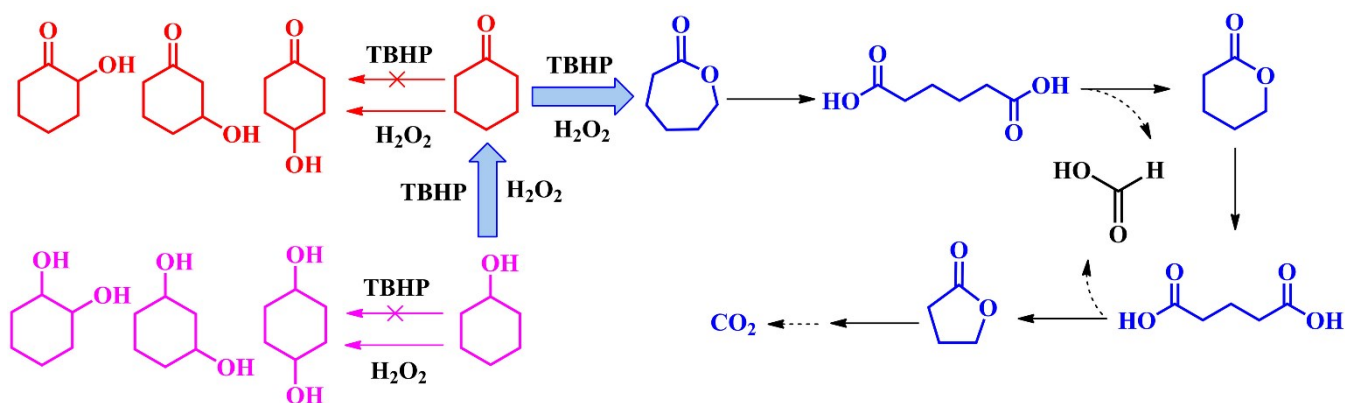

**Figure S8.** Proposed reaction pathways for CHOL deep oxidation using excessive TBHP or H<sub>2</sub>O<sub>2</sub> oxidant.

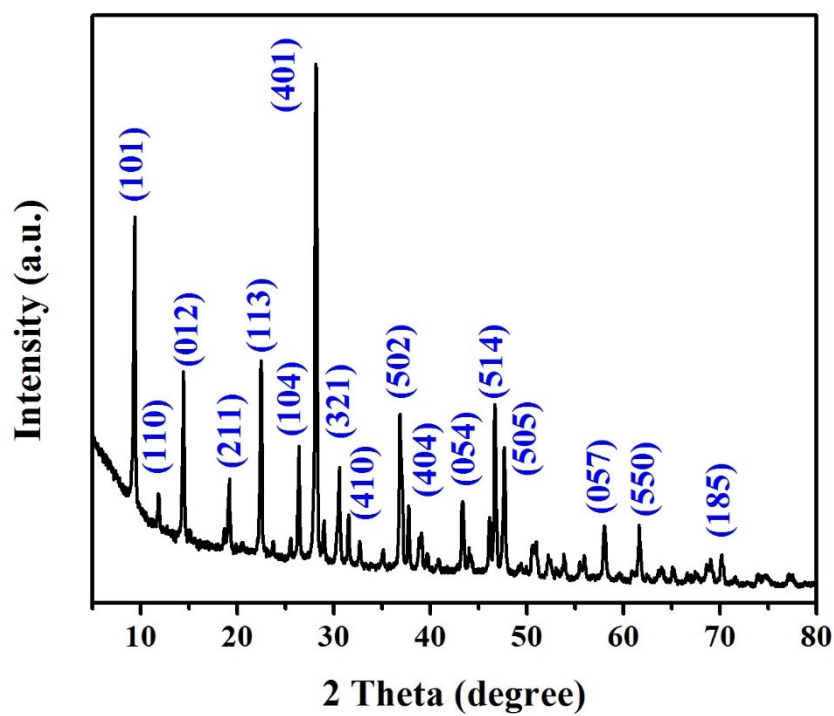

**Figure S9.** XRD pattern of 20% Cr-PKU-8 repeatedly used for 10 runs.
